# Supplementary material for: Assessing methodological quality of Russian clinical practice guidelines and introducing AGREE II instrument in Russia
Source: PLoS One. 2018 Sep 11;13(9):e0203328. doi: 10.1371/journal.pone.0203328 (PMC6133363; doi:10.1371/journal.pone.0203328)
Supplement: S7 Table — (XLSX) [file pone.0203328.s014.xlsx]

## Sheet: Sheet1
	S7 Table. Assessment of the methodological quality of CPG for treating acute pancreatitis with the AGREE II instrument.
		E1	E2	E3	E4	TOTAL (n)	Total %
	SCOPE AND PURPOSE	7	7	7	17	38	36.11
1	The overall objective(s) of the guideline is (are) specifically described.	1	3	1	6	11
2	The health question(s) covered by the guideline is (are) specifically described.	3	2	3	5	13
3	The population (patients, public, etc.) to whom the guideline is meant to apply is specifically described.	3	2	3	6	14
	STAKEHOLDER INVOLVEMENT	9	6	6	13	34	30.56
4	The guideline development group includes individuals from all the relevant professional groups.	4	3	3	4	14
5	The views and preferences of the target population (patients, public, etc.) have been sought.	2	1	1	5	9
6	The target users of the guideline are clearly defined.	3	2	2	4	11
	RIGOUR OF DEVELOPMENT	8	8	8	42	66	17.71
7	Systematic methods were used to search for evidence.	1	1	1	2	5
8	The criteria for selecting the evidence are clearly described.	1	1	1	7	10
9	The strengths and limitations of the body of evidence are clearly described.	1	1	1	7	10
10	The methods for formulating the recommendations are clearly described.	1	1	1	7	10
11	The health benefits, side effects, and risks have been considered in formulating the recommendations.	1	1	1	5	8
12	There is an explicit link between the recommendations and the supporting evidence.	1	1	1	4	7
13	The guideline has been externally reviewed by experts prior to its publication.	1	1	1	7	10
14	A procedure for updating the guideline is provided.	1	1	1	3	6
	CLARITY OF PRESENTATION	14	9	13	9	45	45.83
15	The recommendations are specific and unambiguous.	3	2	3	4	12
16	The different options for management of the condition or health issue are clearly presented.	4	2	3	3	12
17	Key recommendations are easily identifiable.	7	5	7	2	21
	APPLICABILITY	6	4	6	13	29	13.54
18	The guideline describes facilitators and barriers to its application.	2	1	2	1	6
19	The guideline provides advice and/or tools on how the recommendations can be put into practice.	2	1	2	4	9
20	The potential resource implications of applying the recommendations have been considered.	1	1	1	1	4
21	The guideline presents monitoring and/ or auditing criteria.	1	1	1	7	10
	EDITORIAL INDEPENDENCE	2	2	2	5	11	6.25
22	The views of the funding body have not influenced the content of the guideline.	1	1	1	4	7
23	Competing interests of guideline development group members have been recorded and addressed.	1	1	1	1	4
	TOTAL SUM OF ASSESSMENT	46	36	42	99	223	23.73
