# Supplementary material for: Assessing methodological quality of Russian clinical practice guidelines and introducing AGREE II instrument in Russia
Source: PLoS One. 2018 Sep 11;13(9):e0203328. doi: 10.1371/journal.pone.0203328 (PMC6133363; doi:10.1371/journal.pone.0203328)
Supplement: S16 Table — (XLSX) [file pone.0203328.s023.xlsx]

## Sheet: Sheet1
	S16 Table. Authors' assessment of the methodological quality of CPG for treating chronic pancreatitis with the AGREE II instrument
		E1	E2	E3	TOTAL (n)	Total %
	SCOPE AND PURPOSE	21	21	21	63	100
1	The overall objective(s) of the guideline is (are) specifically described.	7	7	7	21
2	The health question(s) covered by the guideline is (are) specifically described.	7	7	7	21
3	The population (patients, public, etc.) to whom the guideline is meant to apply is specifically described.	7	7	7	21
	STAKEHOLDER INVOLVEMENT	14	12	12	38	53.7
4	The guideline development group includes individuals from all the relevant professional groups.	6	4	4	14
5	The views and preferences of the target population (patients, public, etc.) have been sought.	1	1	1	3
6	The target users of the guideline are clearly defined.	7	7	7	21
	RIGOUR OF DEVELOPMENT	45	20	23	88	44.44
7	Systematic methods were used to search for evidence.	7	7	7	21
8	The criteria for selecting the evidence are clearly described.	7	1	2	10
9	The strengths and limitations of the body of evidence are clearly described.	5	1	1	7
10	The methods for formulating the recommendations are clearly described.	6	1	1	8
11	The health benefits, side effects, and risks have been considered in formulating the recommendations.	5	1	1	7
12	There is an explicit link between the recommendations and the supporting evidence.	7	1	3	11
13	The guideline has been externally reviewed by experts prior to its publication.	1	1	1	3
14	A procedure for updating the guideline is provided.	7	7	7	21
	CLARITY OF PRESENTATION	16	9	12	37	51.85
15	The recommendations are specific and unambiguous.	4	1	3	8
16	The different options for management of the condition or health issue are clearly presented.	5	1	2	8
17	Key recommendations are easily identifiable.	7	7	7	21
	APPLICABILITY	9	4	4	17	6.94
18	The guideline describes facilitators and barriers to its application.	1	1	1	3
19	The guideline provides advice and/or tools on how the recommendations can be put into practice.	3	1	1	5
20	The potential resource implications of applying the recommendations have been considered.	1	1	1	3
21	The guideline presents monitoring and/ or auditing criteria.	4	1	1	6
	EDITORIAL INDEPENDENCE	2	2	2	6	0
22	The views of the funding body have not influenced the content of the guideline.	1	1	1	3
23	Competing interests of guideline development group members have been recorded and addressed.	1	1	1	3
	TOTAL SUM OF ASSESSMENT	107	68	74	249	43.48
